# Supplementary material for: Genetic Load and Potential Mutational Meltdown in Cancer Cell Populations
Source: Oxford University Press journal article supplement (doi:10.1093/molbev/msy231), 2018-12-04
Supplement: msy231_supp.pdf [file msy231_supp.pdf]

## Supplementary Information :

### Genetic load and potential mutational meltdown in cancer cell populations

Yuezheng Zhang,<sup>†,1</sup> Yawei Li,<sup>†,1,2</sup> Tao Li,<sup>†,1,2</sup> Xu Shen,<sup>†,1,3</sup> Tianqi Zhu,<sup>4,5</sup> Yong Tao,<sup>1</sup> Xueying Li,<sup>6</sup> Di Wang,<sup>1</sup> Qin Ma,<sup>1,2</sup> Zheng Hu,<sup>1</sup> Jialin Liu,<sup>1</sup> Jue Ruan,<sup>1</sup> Jun Cai,<sup>1,2</sup> Hurng-Yi Wang,<sup>\*,7</sup> Xuemei Lu,<sup>\*,1,2</sup>

<sup>1</sup>Key Laboratory of Genomics and Precision Medicine, Beijing Institute of Genomics, Beijing 100101; CAS Center for Excellence in Animal Evolution and Genetics, Kunming 650223, Chinese Academy of Sciences, China

<sup>2</sup>University of Chinese Academy of Sciences, Beijing, China

<sup>3</sup>State Key Laboratory of Biocontrol, School of Life Sciences, Sun Yat-Sen University, Guangzhou 510275, China

<sup>4</sup>Institute of Applied Mathematics, Academy of Mathematics and Systems Science, Chinese Academy of Sciences, Beijing 100190, China

<sup>5</sup>Key Laboratory of Random Complex Structures and Data Science, Academy of Mathematics and Systems Science, Chinese Academy of Sciences, Beijing 100190, China

<sup>6</sup>School of Life Sciences, Peking University, Beijing 100871, China

<sup>7</sup>Graduate Institute of Clinical Medicine; Institute of Ecology and Evolutionary Biology; National Taiwan University, Taipei 100, Taiwan

\*For correspondence: [hurngyi@ntu.edu.tw](mailto:hurngyi@ntu.edu.tw) (H-YW); [luxm@big.ac.cn](mailto:luxm@big.ac.cn) (XL).

<sup>†</sup>These authors contributed equally to this work.

**Supplementary material includes:**

**Supplementary Figures S1-S5**

**Supplementary Tables S1-S5**

## Supplementary Figures:

- \* Whole genome sequencing
- △ Growth rate estimation
- Karyotype analysis

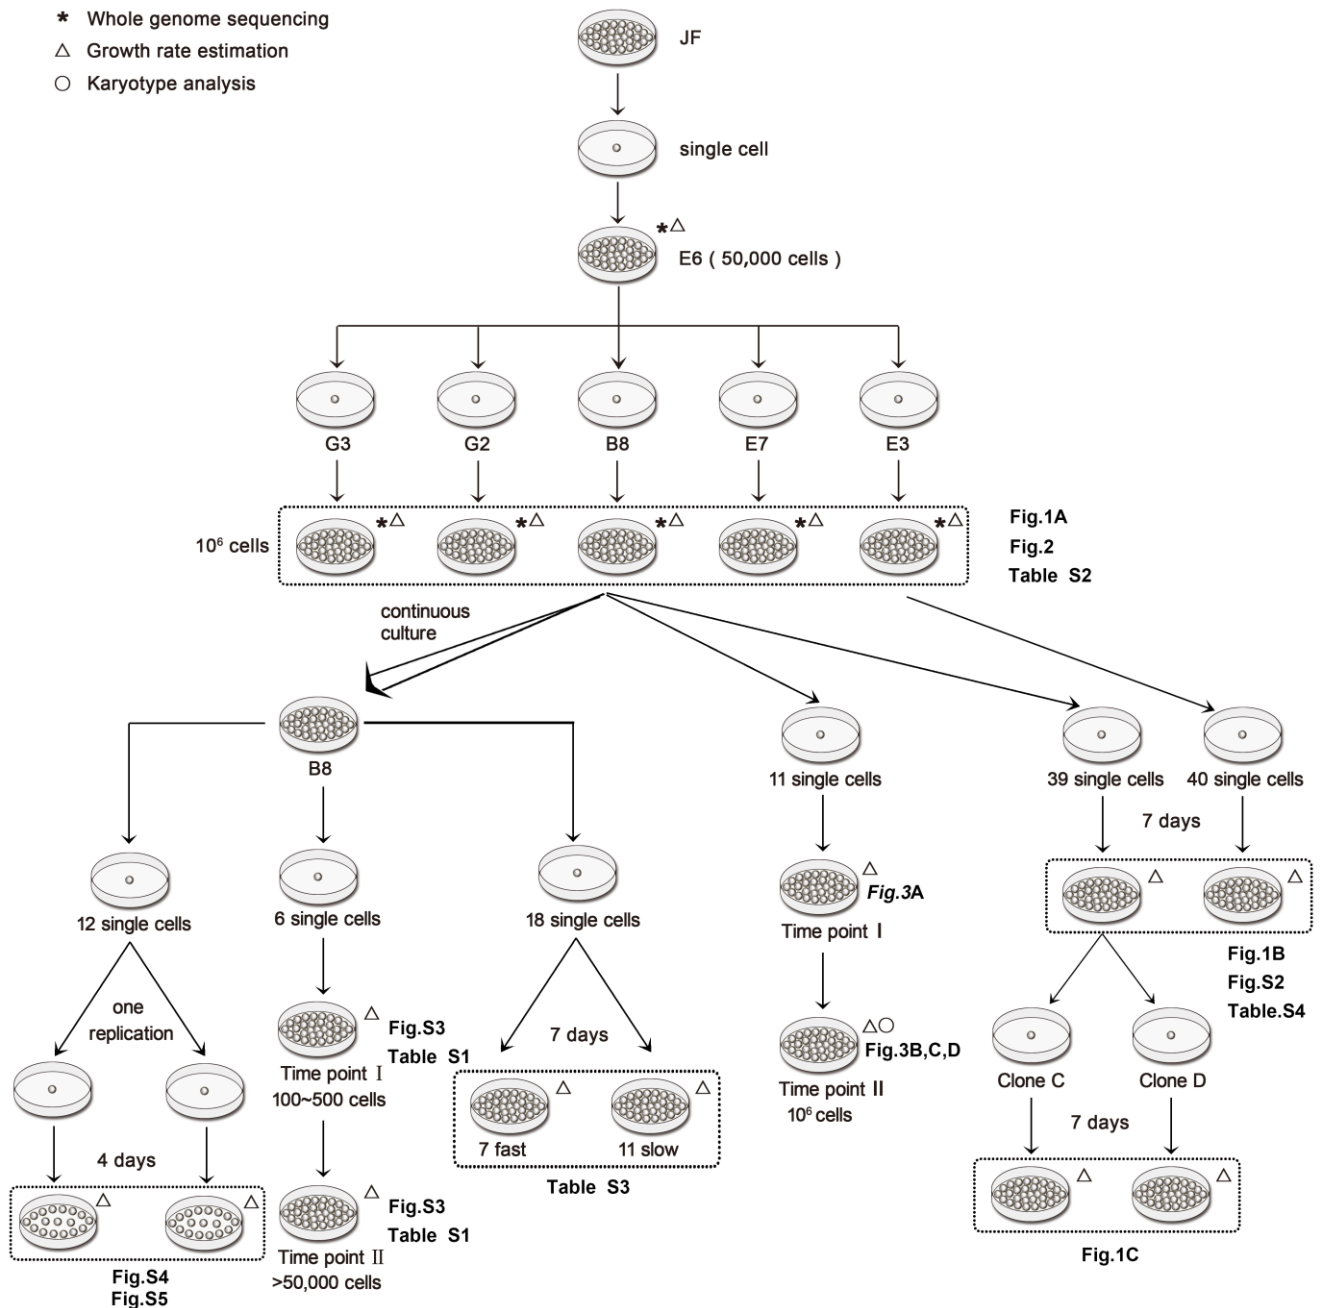

**Fig. S1. Cell culture and experimental scheme.** A single cell (E6) was randomly drawn from a HeLa cell line (JF) and defined as the ancestral clone. Five clones (B8, G3, E3, E7, G2) were random chosen from E6 when the population size of E6 reached up to > 50,000 cells. The clones B8 and E3 kept cultured for further experiments which are shown in the schematic diagram and described in the *Results* and *Materials and Methods*.

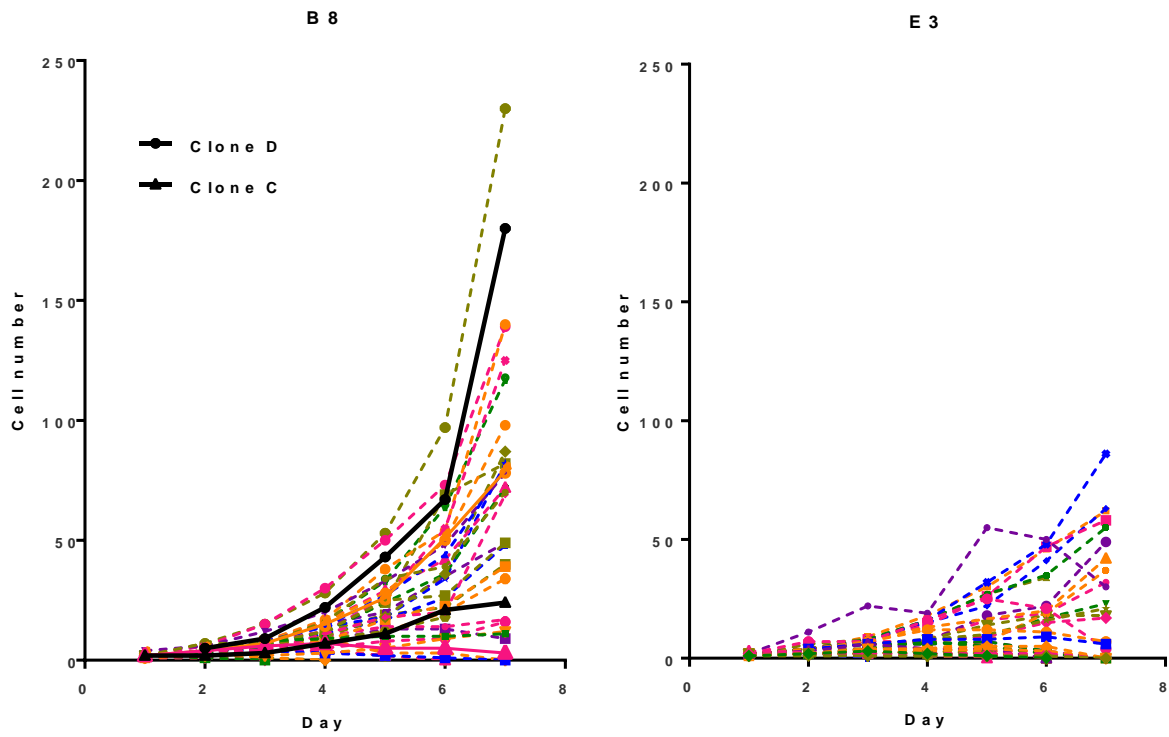

**Fig. S2. Growth curves of cell clones from B8 (left) and E3 (right).** Each curve represents a single cell clone from day 1 to day 7.

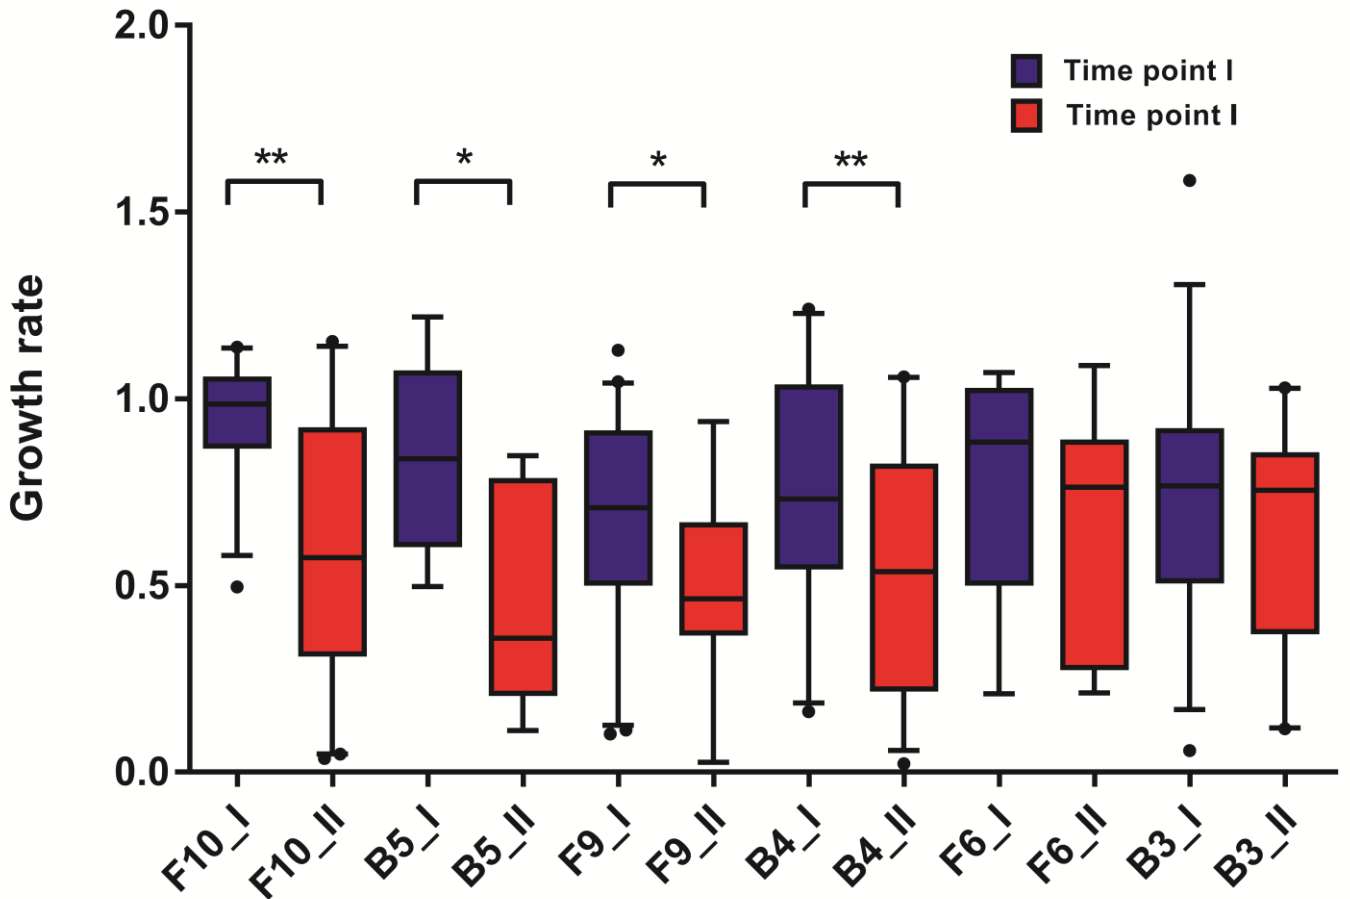

**Fig. S3.** The growth rates of six clones (F10 to B3, labeled on the x-axis) from B8 at the time point I and II. When cell numbers of these six single cell clones reached to 100-500 (after approximately 7-10 cell divisions; Table S1), 20~30% of cells from each clone were randomly drawn and separated into single cells. The growth of these cells was monitored for 8 days (time point I, blue boxplots). When cell numbers reached to at least 5000 cells (time point II, red boxplots), a number of single cell clones (Table S1) were generated, and the cell growth for those clones was monitored again. \*: P-value < 0.05; \*\*: P-value < 0.01, *t*-test.

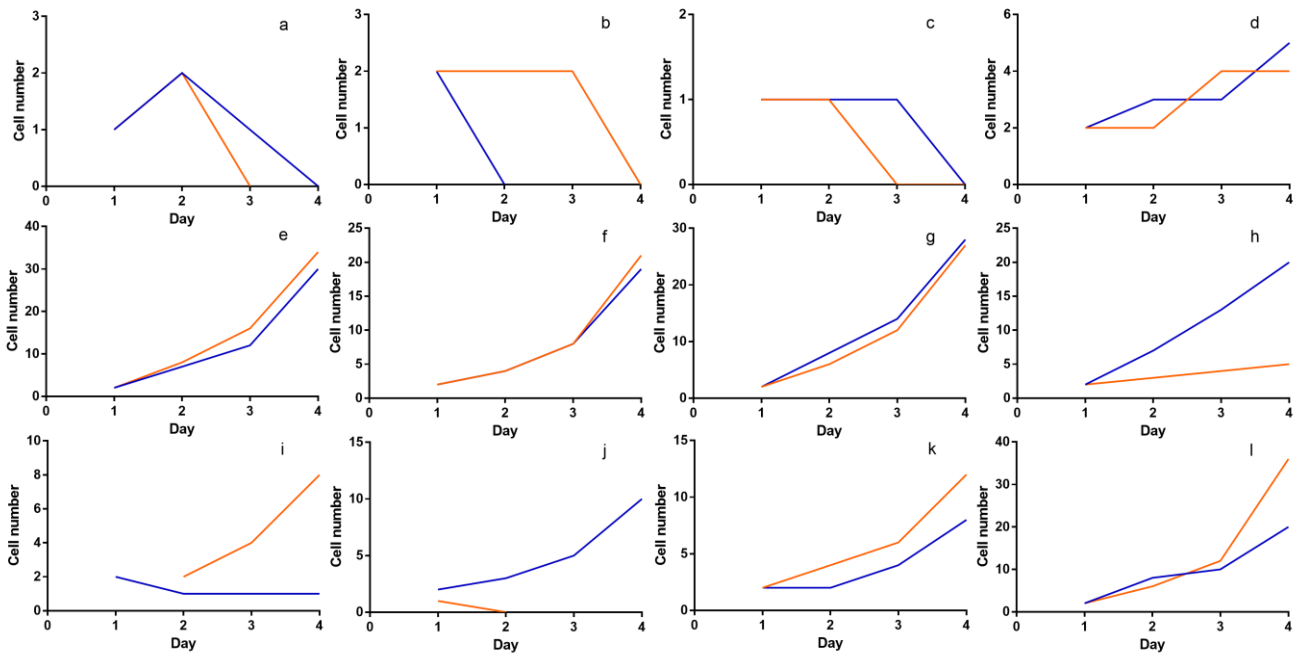

**Fig. S4. Proliferation rate differences between pairs of daughter cells.** Growth graph of two daughter cells (blue and orange line) derived from a single cell. The number (y-axis) of cells in 12 pairs (a to l) of daughter cells was counted every day for four days.

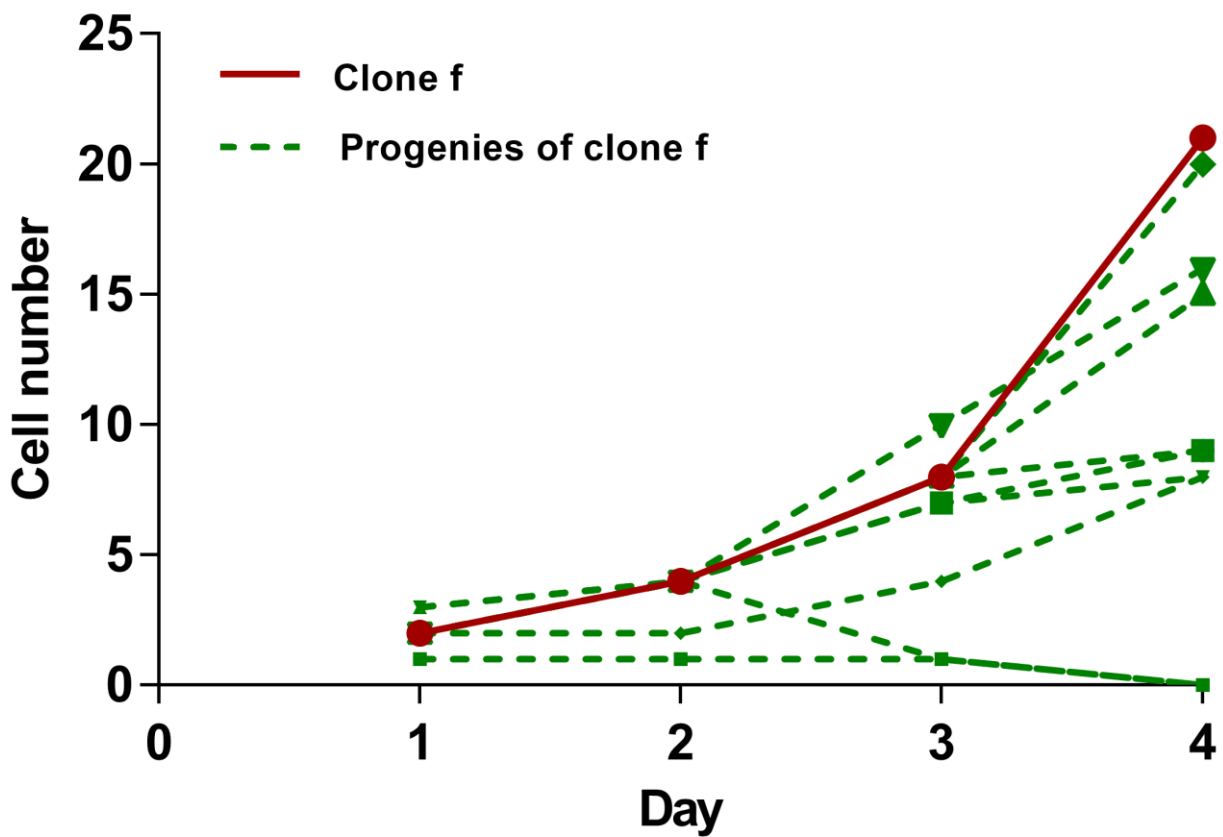

**Fig. S5. Proliferation rate differences between clone f and its progenies.** Growth graph of progeny cells from clone f. The progeny cells were isolated from clone f and monitored for four days. Maroon solid line: clone f; Green dashed line: progenies of clone f.

## Supplementary Tables:

**Table S1. Number of clones that were generated from six clones at time point I and II**

| Clones from B8 <sup>a</sup> | Time point | Cell number <sup>b</sup> | Clone number <sup>c</sup> |
|-----------------------------|------------|--------------------------|---------------------------|
| F10                         | I          | 182                      | 61                        |
|                             | II         | 5000                     | 81                        |
| F6                          | I          | 133                      | 27                        |
|                             | II         | 54000                    | 18                        |
| E3                          | I          | 271                      | 74                        |
|                             | II         | 27100                    | 33                        |
| F9                          | I          | 430                      | 62                        |
|                             | II         | 16500                    | 23                        |
| B4                          | I          | 100                      | 33                        |
|                             | II         | 10000                    | 33                        |
| B5                          | I          | 100                      | 18                        |
|                             | II         | 10000                    | 12                        |

<sup>a</sup>Single cell isolations and growth rate measurements were performed for the 6 cell clones (B4 ~ F10) at the two time points. See Fig. S3 and Results for the details of the growth rate measurement.

<sup>b</sup>The number of cells in the six clones at the time point I and II.

<sup>c</sup>The number of clones that were randomly isolated and generated from the 6 clones at the time point I and II.

**Table S2. Copy number gain and loss of five descendant clones compared to their ancestor clone (E6).**

| Descendant clones from E6 | Chromosome | Start       | End         | Length      | Median ratio | Copy number gain/ loss |
|---------------------------|------------|-------------|-------------|-------------|--------------|------------------------|
| B8                        | 17         | 0           | 18,000,000  | 18,000,000  | 1.30         | gain                   |
|                           | 18         | 24,300,000  | 70,850,000  | 46,550,000  | 1.36         | gain                   |
| G3                        | 5          | 0           | 47,000,000  | 47,000,000  | 0.73         | loss                   |
|                           | 18         | 30,900,001  | 78,077,248  | 47,177,247  | 1.30         | gain                   |
| E3                        | 2          | 0           | 43,000,000  | 43,000,000  | 0.71         | loss                   |
|                           | 3          | 185,650,000 | 197,800,000 | 12,150,000  | 0.80         | loss                   |
|                           | 4          | 0           | 16,700,000  | 16,700,000  | 0.78         | loss                   |
|                           | 4          | 170,350,000 | 190,850,000 | 20,500,000  | 1.45         | gain                   |
|                           | 5          | 15,600,000  | 38,600,000  | 23,000,000  | 0.77         | loss                   |
|                           | 10         | 35,650,000  | 53,660,000  | 18,010,000  | 0.79         | loss                   |
|                           | 10         | 105,250,000 | 123,850,000 | 18,600,000  | 0.79         | loss                   |
|                           | 15         | 90,450,000  | 102,531,392 | 12,081,392  | 1.30         | gain                   |
|                           | X          | 0           | 33,950,000  | 33,950,000  | 0.55         | loss                   |
|                           | G2         | 1           | 30,550,000  | 119,600,000 | 89,050,000   | 0.79                   |
| 4                         |            | 0           | 178,750,000 | 178,750,000 | 0.74         | loss                   |
| 5                         |            | 0           | 46,400,000  | 46,400,000  | 0.64         | loss                   |
| 6                         |            | 0           | 25,350,000  | 25,350,000  | 1.38         | gain                   |
| 10                        |            | 0           | 17,200,000  | 17,200,000  | 0.80         | loss                   |
| E7                        | 4          | 0           | 16,700,000  | 16,700,000  | 0.80         | loss                   |
|                           | 8          | 2,500,000   | 19,150,000  | 16,650,000  | 0.75         | loss                   |
|                           | 11         | 117,950,000 | 135,006,516 | 17,056,516  | 0.72         | loss                   |
|                           | 14         | 0           | 40,860,000  | 40,860,000  | 0.73         | loss                   |
|                           | 14         | 52,550,000  | 107,349,540 | 54,799,540  | 0.71         | loss                   |
|                           | 20         | 15,000,000  | 29,800,000  | 14,800,000  | 0.51         | loss                   |
|                           | 20         | 29,800,000  | 60,700,000  | 30,900,000  | 0.79         | loss                   |
| X                         | 0          | 24,000,000  | 24,000,000  | 0.80        | loss         |                        |



**Table S3. The number of cells in single cell clones<sup>a</sup> from B8 and parameter estimation<sup>b</sup>.**

| Clone                    | Day |   |   |    |    |    |     | Parameter estimation |       |      |                |      |
|--------------------------|-----|---|---|----|----|----|-----|----------------------|-------|------|----------------|------|
|                          | 1   | 2 | 3 | 4  | 5  | 6  | 7   | $R_0$                | $\mu$ | $s$  | $\mu \times s$ |      |
| Fast<br>growing<br>cells | #1  | 2 | 4 | 8  | 15 | 30 | 45  | 101                  | 2.22  | 0.26 | 0.17           | 0.04 |
|                          | #2  | 2 | 4 | 8  | 20 | 52 | 99  | 182                  | 2.48  | 0.29 | 0.18           | 0.05 |
|                          | #3  | 2 | 5 | 10 | 23 | 51 | 84  | 150                  | 2.41  | 0.30 | 0.19           | 0.06 |
|                          | #4  | 2 | 4 | 8  | 20 | 38 | 57  | 107                  | 2.29  | 0.30 | 0.18           | 0.05 |
|                          | #5  | 2 | 4 | 14 | 32 | 61 | 112 | 190                  | 2.52  | 0.29 | 0.20           | 0.06 |
|                          | #6  | 2 | 4 | 12 | 20 | 41 | 100 | 187                  | 2.44  | 0.26 | 0.17           | 0.04 |
|                          | #7  | 2 | 4 | 8  | 20 | 33 | 55  | 104                  | 2.26  | 0.30 | 0.17           | 0.05 |
| Slow<br>growing<br>cells | #8  | 2 | 4 | 7  | 18 | 23 | 35  | 66                   | 2.13  | 0.31 | 0.18           | 0.06 |
|                          | #9  | 2 | 4 | 7  | 17 | 27 | 46  | 88                   | 2.19  | 0.27 | 0.17           | 0.05 |
|                          | #10 | 2 | 4 | 7  | 13 | 19 | 27  | 46                   | 1.99  | 0.27 | 0.17           | 0.05 |
|                          | #11 | 2 | 4 | 6  | 10 | 17 | 30  | 61                   | 2.04  | 0.25 | 0.16           | 0.04 |
|                          | #12 | 2 | 4 | 8  | 15 | 27 | 48  | 82                   | 2.17  | 0.27 | 0.19           | 0.05 |
|                          | #13 | 2 | 4 | 4  | 5  | 6  | 9   | 11                   | 1.66  | 0.32 | 0.18           | 0.06 |
|                          | #14 | 1 | 4 | 6  | 9  | 15 | 25  | 34                   | 1.96  | 0.29 | 0.20           | 0.06 |
|                          | #15 | 2 | 3 | 5  | 7  | 11 | 13  | 20                   | 1.76  | 0.28 | 0.20           | 0.06 |
|                          | #16 | 2 | 2 | 4  | 8  | 13 | 19  | 23                   | 1.89  | 0.31 | 0.20           | 0.06 |
|                          | #17 | 2 | 4 | 8  | 11 | 18 | 26  | 32                   | 1.97  | 0.33 | 0.18           | 0.06 |
|                          | #18 | 2 | 4 | 8  | 15 | 30 | 51  | 88                   | 2.21  | 0.27 | 0.18           | 0.05 |

<sup>a</sup>Single cells were randomly drawn from B8, followed by cell culture for seven days. The cell numbers in the single cell clones were counted every day. According to their cell numbers on the 7<sup>th</sup> day, newly derived cell clones are grouped into fast (cell number > 100) and slow (cell number < 100) growing clones.

<sup>b</sup>The Approximate Bayesian Computation (ABC) method was performed to estimate  $R_0$ ,  $\mu$  and  $s$  for each clone (see *Materials and Methods*).

**Table S4.  $R_0$  estimation with constant  $\mu$  and  $s$ .**

| Clone  | Observed data |   |    |    |    |    |     | $R_0$ | Expected data |     |      |      |      |       |       | Chi-square test<br>(P-value) |
|--------|---------------|---|----|----|----|----|-----|-------|---------------|-----|------|------|------|-------|-------|------------------------------|
|        | 1             | 2 | 3  | 4  | 5  | 6  | 7   |       | 1             | 2   | 3    | 4    | 5    | 6     | 7     |                              |
| #1     | 2             | 7 | 7  | 16 | 34 | 39 | 70  | 2.13  | 2.1           | 4.3 | 8.2  | 14.9 | 25.6 | 41.8  | 64.5  | 0.672                        |
| #2     | 2             | 4 | 8  | 9  | 10 | 10 | 11  | 1.64  | 1.6           | 2.5 | 3.8  | 5.2  | 6.9  | 8.7   | 10.4  | 0.468                        |
| #4     | 4             | 6 | 12 | 20 | 33 | 48 | 78  | 2.18  | 2.2           | 4.5 | 8.8  | 16.4 | 28.8 | 48.0  | 75.9  | 0.773                        |
| #5     | -             | 4 | 4  | 11 | 18 | 20 | 69  | 2.16  | 2.2           | 4.4 | 8.6  | 15.8 | 27.5 | 45.4  | 71.2  | 5.208e-08***                 |
| #6     | 2             | 4 | 8  | 16 | 28 | 50 | 98  | 2.26  | 2.3           | 4.8 | 9.8  | 18.9 | 34.5 | 59.6  | 97.7  | 0.611                        |
| #8     | 2             | 4 | 8  | 16 | 29 | 42 | 72  | 2.17  | 2.2           | 4.5 | 8.7  | 16.0 | 28.1 | 46.7  | 73.5  | 0.994                        |
| #9     | 1             | 2 | 2  | 3  | 5  | 9  | 12  | 1.67  | 1.7           | 2.6 | 4.0  | 5.6  | 7.6  | 9.7   | 11.8  | 0.387                        |
| #11    | 2             | 3 | 6  | 12 | 24 | 36 | 72  | 2.18  | 2.2           | 4.5 | 8.8  | 16.4 | 28.8 | 48.0  | 75.9  | 0.182                        |
| #12    | 2             | 4 | 8  | 14 | 18 | 34 | 82  | 2.20  | 2.2           | 4.6 | 9.1  | 17.0 | 30.1 | 50.7  | 80.9  | 0.008**                      |
| #13    | 2             | 4 | 8  | 15 | 20 | 35 | 49  | 2.04  | 2.0           | 3.9 | 7.2  | 12.6 | 20.7 | 32.3  | 47.7  | 0.994                        |
| #14    | -             | 4 | 8  | 12 | 26 | 55 | 125 | 2.33  | 2.3           | 5.1 | 10.8 | 21.4 | 40.2 | 71.6  | 120.9 | 6.323e-04***                 |
| #16    | -             | 4 | 7  | 12 | 24 | 69 | 82  | 2.23  | 2.2           | 4.7 | 9.4  | 17.9 | 32.3 | 55.0  | 89.0  | 0.071                        |
| #17    | 2             | 6 | 15 | 30 | 50 | 73 | 139 | 2.36  | 2.4           | 5.3 | 11.2 | 22.5 | 42.8 | 77.3  | 132.3 | 0.594                        |
| #18    | 1             | 4 | 3  | 8  | 17 | 23 | 39  | 1.97  | 2.0           | 3.7 | 6.5  | 10.9 | 17.4 | 26.2  | 37.4  | 0.352                        |
| B8 #19 | 2             | 4 | 7  | 9  | 12 | 18 | -   | 1.82  | 1.8           | 3.1 | 5.1  | 8.0  | 11.7 | 16.3  | 21.5  | 0.961                        |
| #20    | 2             | 4 | 7  | 15 | 26 | 51 | 79  | 2.19  | 2.2           | 4.5 | 8.9  | 16.7 | 29.5 | 59.4  | 78.4  | 0.852                        |
| #21    | 2             | 4 | 8  | 16 | 33 | 64 | 117 | 2.31  | 2.3           | 5.1 | 10.5 | 20.6 | 38.5 | 68.0  | 113.9 | 0.717                        |
| #23    | 2             | 2 | 3  | 7  | 11 | 21 | 24  | 1.89  | 1.9           | 3.4 | 5.7  | 9.3  | 14.1 | 20.4  | 27.9  | 0.458                        |
| #24    | 2             | 3 | 6  | 10 | 14 | 14 | 17  | 1.76  | 1.8           | 2.9 | 4.6  | 7.0  | 9.9  | 13.3  | 17.0  | 0.865                        |
| #26    | 2             | 7 | 15 | 28 | 53 | 97 | 230 | 2.54  | 2.5           | 6.1 | 14.0 | 30.2 | 61.8 | 120.2 | 221.3 | 0.252                        |
| #27    | -             | 4 | 5  | 5  | 8  | 9  | 16  | 1.68  | 1.7           | 2.7 | 4.0  | 5.8  | 7.8  | 10.1  | 12.3  | 0.883                        |
| #28    | 1             | 3 | 6  | 8  | 12 | 20 | 34  | 1.92  | 1.9           | 4.5 | 6.0  | 9.9  | 15.3 | 22.4  | 31.2  | 0.752                        |
| #29    | 2             | 4 | 8  | 12 | 19 | 22 | 40  | 1.94  | 1.9           | 3.6 | 6.2  | 10.3 | 16.1 | 23.9  | 33.5  | 0.884                        |
| #32    | 2             | 4 | 6  | 10 | 18 | 36 | 87  | 2.21  | 2.2           | 4.6 | 9.2  | 17.3 | 30.8 | 52.1  | 83.5  | 6.214e-04***                 |
| #33    | 2             | 4 | 7  | 12 | 25 | 27 | 49  | 1.99  | 2.0           | 3.8 | 6.7  | 11.4 | 18.3 | 27.8  | 40.0  | 0.741                        |
| #35    | -             | 5 | 9  | 22 | 43 | 67 | 180 | 2.45  | 2.5           | 5.7 | 12.5 | 26.1 | 51.6 | 96.8  | 171.9 | 3.548e-03**                  |
| #36    | 2             | 4 | 8  | 14 | 27 | 44 | 80  | 2.19  | 2.2           | 4.5 | 8.9  | 16.7 | 29.5 | 59.4  | 78.4  | 0.385                        |
| #37    | 2             | 4 | 8  | 17 | 38 | 54 | 140 | 2.37  | 2.4           | 5.3 | 11.3 | 22.9 | 43.7 | 79.3  | 136.2 | 0.011*                       |
| #38    | 2             | 3 | 6  | 11 | 17 | 26 | 48  | 2.01  | 2.0           | 3.8 | 6.9  | 11.8 | 19.2 | 29.5  | 43.0  | 0.946                        |
| #1     | 1             | 2 | 3  | 8  | 16 | 19 | 32  | 1.93  | 1.9           | 3.5 | 6.1  | 10.1 | 15.7 | 23.1  | 32.4  | 0.361                        |
| #2     | 2             | 4 | 9  | 18 | 30 | 46 | 62  | 2.12  | 2.1           | 4.3 | 8.1  | 14.6 | 25.1 | 40.6  | 62.4  | 0.901                        |
| #4     | 2             | 2 | 4  | 8  | 9  | 17 | 23  | 1.83  | 1.8           | 3.2 | 5.2  | 8.1  | 12.0 | 16.8  | 22.3  | 0.908                        |
| #7     | -             | 4 | 8  | 14 | 26 | 47 | 58  | 2.10  | 2.1           | 4.2 | 7.9  | 14.1 | 23.9 | 38.4  | 58.4  | 0.882                        |
| #13    | 2             | 4 | 8  | 16 | 27 | 35 | 55  | 2.06  | 2.1           | 4.0 | 7.4  | 13.1 | 21.7 | 34.2  | 51.1  | 0.928                        |
| #14    | 2             | 4 | 7  | 16 | 32 | 48 | 86  | 2.21  | 2.2           | 4.6 | 9.2  | 17.3 | 30.8 | 52.1  | 83.5  | 0.967                        |
| E3 #18 | -             | 4 | 6  | 8  | 10 | 16 | 21  | 1.77  | 1.8           | 3.0 | 4.7  | 7.1  | 10.1 | 13.8  | 17.7  | 0.918                        |
| #22    | 2             | 4 | 8  | 15 | 22 | 41 | 63  | 2.11  | 2.1           | 4.2 | 8.0  | 14.4 | 24.5 | 39.5  | 60.4  | 0.998                        |
| #30    | 2             | 4 | 8  | 13 | -  | 20 | 42  | 1.96  | 2.0           | 3.6 | 6.4  | 10.7 | 16.9 | 25.4  | 36.0  | 0.687                        |
| #31    | 2             | 4 | 4  | 8  | 14 | 18 | 18  | 1.78  | 1.8           | 3.0 | 4.8  | 7.3  | 1.1  | 14.2  | 18.4  | 0.039*                       |
| #34    | 2             | 4 | 7  | 7  | 9  | 15 | 17  | 1.74  | 1.7           | 2.9 | 4.5  | 6.6  | 9.3  | 12.4  | 15.7  | 0.935                        |
| #35    | 1             | 2 | 2  | 4  | 7  | 19 | 37  | 1.97  | 2.0           | 3.7 | 6.5  | 10.9 | 17.4 | 26.2  | 37.4  | 1.364e-07***                 |
| #38    | 2             | 2 | 4  | 7  | 18 | 22 | 49  | 2.04  | 2.0           | 3.9 | 7.2  | 12.6 | 20.7 | 32.3  | 47.7  | 0.028*                       |
| #40    | 1             | 6 | 8  | 16 | 27 | 34 | -   | 2.11  | 2.1           | 4.2 | 8.0  | 14.4 | 24.5 | 39.5  | 60.4  | 0.695                        |

NOTE. — Using ABC method with the fixed  $\mu$  (0.29) and  $s$  (0.18),  $R_0$  was estimated from the cell clones derived from B8 and E3. The expected data were calculated from equation (1) using the estimated  $R_0$ . Chi-square test was used to test whether the expected data are fitted with the observed data. \*, P-value < 0.05; \*\*, P-value < 0.01; \*\*\*, P-value < 0.001.

**Table S5. Cell numbers of single cell clones in different cancer cell lines.**

| Cell line             | Clone | Day |   |    |    |    |     |     | Parameter estimation |       |      |                |
|-----------------------|-------|-----|---|----|----|----|-----|-----|----------------------|-------|------|----------------|
|                       |       | 1   | 2 | 3  | 4  | 5  | 6   | 7   | $R_0$                | $\mu$ | $s$  | $\mu \times s$ |
| PC3 (Prostate cancer) | #1    | 2   | 2 | 4  | 4  | 10 | 13  | -   | 1.79                 | 0.30  | 0.18 | 0.05           |
|                       | #2    | 1   | 2 | 4  | 7  | 6  | 13  | 25  | 1.87                 | 0.28  | 0.18 | 0.05           |
|                       | #3    | 2   | 4 | 4  | 8  | 11 | 17  | -   | 1.85                 | 0.31  | 0.20 | 0.06           |
|                       | #4    | 2   | 2 | 4  | 9  | 15 | 32  | 55  | 2.11                 | 0.27  | 0.17 | 0.05           |
|                       | #5    | 1   | 2 | 2  | 5  | 7  | 11  | 18  | 1.80                 | 0.29  | 0.18 | 0.05           |
|                       | #6    | 1   | 1 | 2  | 3  | 3  | 8   | 13  | 1.69                 | 0.28  | 0.18 | 0.05           |
|                       | #7    | 1   | 1 | 2  | 2  | 4  | 8   | 15  | 1.68                 | 0.27  | 0.17 | 0.05           |
|                       | #8    | 1   | 2 | 3  | 3  | 7  | 13  | 23  | 1.83                 | 0.28  | 0.16 | 0.04           |
|                       | #9    | 1   | 2 | 2  | 4  | 8  | 12  | 25  | 1.84                 | 0.26  | 0.17 | 0.04           |
|                       | #10   | 1   | 2 | 4  | 4  | 8  | 13  | 18  | 1.80                 | 0.29  | 0.18 | 0.05           |
| A204 (Rhabdosarcoma)  | #1    | 3   | 4 | 7  | 8  | 13 | 21  | 26  | 1.89                 | 0.33  | 0.21 | 0.07           |
|                       | #2    | 2   | 2 | 2  | 3  | 6  | 13  | 26  | 1.87                 | 0.28  | 0.18 | 0.05           |
|                       | #3    | 2   | 2 | 3  | 9  | 12 | 15  | 16  | 1.83                 | 0.33  | 0.22 | 0.07           |
|                       | #4    | 2   | 3 | 6  | 7  | 14 | 23  | 30  | 1.92                 | 0.30  | 0.20 | 0.06           |
|                       | #5    | 2   | 4 | 6  | 7  | 13 | 21  | 26  | 1.89                 | 0.31  | 0.20 | 0.06           |
|                       | #6    | 2   | 4 | 9  | 15 | 18 | 28  | 40  | 2.07                 | 0.32  | 0.21 | 0.07           |
|                       | #7    | 1   | 2 | 4  | 4  | 8  | 11  | 20  | 1.81                 | 0.28  | 0.18 | 0.05           |
| A375 (Melanoma)       | #1    | 2   | 3 | 6  | 16 | 24 | 29  | 36  | 2.14                 | 0.34  | 0.23 | 0.08           |
|                       | #2    | 2   | 4 | 14 | 28 | 59 | 97  | 117 | 2.54                 | 0.34  | 0.23 | 0.08           |
|                       | #3    | 2   | 5 | 10 | 23 | 54 | 91  | 172 | 2.42                 | 0.28  | 0.17 | 0.05           |
|                       | #4    | 2   | 3 | 6  | 9  | 17 | 46  | 115 | 2.28                 | 0.27  | 0.17 | 0.05           |
|                       | #5    | 1   | 4 | 6  | 13 | 32 | 67  | 129 | 2.33                 | 0.30  | 0.16 | 0.05           |
|                       | #6    | 2   | 2 | 8  | 14 | 27 | 50  | 86  | 2.20                 | 0.29  | 0.18 | 0.05           |
|                       | #7    | 2   | 4 | 6  | 13 | 25 | 52  | 101 | 2.20                 | 0.27  | 0.17 | 0.05           |
|                       | #8    | 1   | 4 | 6  | 20 | 37 | 74  | 117 | 2.41                 | 0.33  | 0.20 | 0.07           |
|                       | #9    | 2   | 3 | 4  | 11 | 14 | 25  | 38  | 1.95                 | 0.29  | 0.18 | 0.05           |
|                       | #10   | 2   | 4 | 8  | 17 | 47 | 114 | 201 | 2.48                 | 0.28  | 0.17 | 0.05           |
|                       | #11   | 2   | 5 | 13 | 22 | 37 | 56  | 103 | 2.31                 | 0.30  | 0.20 | 0.06           |
|                       | #12   | 2   | 4 | 10 | 22 | 52 | 137 | 262 | 2.51                 | 0.26  | 0.18 | 0.05           |
|                       | #13   | 2   | 5 | 14 | 32 | 62 | 166 | 298 | 2.64                 | 0.29  | 0.18 | 0.05           |
|                       | #14   | 2   | 4 | 7  | 16 | 39 | 75  | 116 | 2.32                 | 0.30  | 0.18 | 0.05           |
|                       | #15   | 1   | 5 | 13 | 18 | 29 | 66  | 124 | 2.35                 | 0.30  | 0.18 | 0.05           |
|                       | #16   | 1   | 5 | 9  | 19 | 38 | 94  | 184 | 2.47                 | 0.28  | 0.18 | 0.05           |
|                       | #17   | 2   | 4 | 10 | 22 | 42 | 89  | 193 | 2.49                 | 0.29  | 0.18 | 0.05           |
